# Supplementary material for: Meteotsunami in the United Kingdom: The hidden hazard
Source: Copernicus journal article supplement (doi:10.5194/egusphere-2022-1145), 2022-11-04
Supplement: Supplementary file 1 [file egusphere-2022-1145-supplement.pdf]

## Supplements.

**Table S1:** The six UK coastal regions and associated NTSFL tide gauge locations.

| South       | East      | West       | Scotland      | Wales         | N. Ireland |
|-------------|-----------|------------|---------------|---------------|------------|
| Avonmouth   | Cromer    | Heysham    | Aberdeen      | Barmouth      | Bangor     |
| Bournemouth | Harwich   | Liverpool  | Kinlochbervie | Fishguard     | Portrush   |
| Dover       | Immingham | Workington | Leith         | Holyhead      |            |
| Hinkley     | Lowestoft | Port Erin  | Lerwick       | Llandudno     |            |
| Ilfracombe  | N Shields |            | Millport      | Milford Haven |            |
| Newhaven    | Sheerness |            | Moray Firth   | Mumbles       |            |
| Newlyn      | Whitby    |            | Port Ellen    | Newport       |            |
| Plymouth    |           |            | Port Patrick  |               |            |
| Portbury    |           |            | Stormoway     |               |            |
| Portsmouth  |           |            | Tobermory     |               |            |
| St Marys    |           |            | Ullapool      |               |            |
| Weymouth    |           |            | Wick          |               |            |

**Table S2:** Locations and times of 5 December 2013 storm surge and meteotsunami.

| Location      | Meteotsunami time | Meteotsunami Wm (m) | Storm surge time         | Storm surge Wm (m) | Time difference (h) |
|---------------|-------------------|---------------------|--------------------------|--------------------|---------------------|
| North Shields | 10.15             | 0.21                | 16.15                    | 1.15               | 6                   |
| Whitby        | 11.00             | 0.3                 | 17.15                    | 1.23               | 6.15                |
| Llandudno     | 12.00             | 0.1                 | 12.00                    | 0.7                | 0                   |
| Ullapool      | 12.45             | 0.31                | 07.15                    | 0.81               | 4.5                 |
| Lowestoft     | 15.15             | 0.27                | 22.30                    | 1.9                | 7.15                |
| Portsmouth    | 17.45             | 0.1                 | 01.00 (6 <sup>th</sup> ) | 0.69               | 7.15                |

### Extract S1.

Full extract from a letter from Robert Blight of Penzance dated 24th May and published in the Cornwall Royal Gazette on Friday 28 May. Long (2015, p26).

“Whilst standing on the beach at Newlyn, on Sunday evening last, about half-past five o’clock, I was surprised at observing a sudden rush of the sea, towards the shore, and also its immediate return. Judging by a boat which lay aground near the beach, the rise was about 18 inches. The water became foul in an instant, owing to the nature of the beach. There was no appearance of a large wave, but a ripple near the shore, and a rushing noise at the time. It was then about low water, wind westerly, sky clouds, threatening rain.... Many persons witnessed this irregular motion of the sea on Sunday, and I have since been informed by a Mousehole fisherman that the sea continued to flow and ebb alternately until near nine o’clock, and that it sometimes rose as much as eight feet. The changes in the atmosphere during the day were very remarkable. In the morning, about six o’clock, we had a breeze from the southeast; by eight, it was a perfect calm; between ten o’clock and two, the mercury sunk several degrees; about three in the afternoon a breeze sprung up suddenly from the west, and the sky, as suddenly, became overcast; by eight o’clock it was again calm; but at eleven, the wind again rose suddenly and whistled along as it does in November. It is very probable that all these changes, and even the agitation of the sea, were produced by electricity; for if we suppose that the irregular motion of the water was occasioned by a distant earthquake, which might have occurred about that time, still the electric field might have been the most potent agent.”
